# Supplementary material
Source: PubMed Central journal article supplement (PMC3805087)
Supplement: supp_13-12551_IOVS-13-12551-s01.pdf [file supp_13-12551_IOVS-13-12551-s01.pdf]

**Table S1.** Primers used: Sequences, amplicon sizes, and efficiencies

| <i>Gene</i> | <i>Forward sequence</i>        | <i>Reverse sequence</i>       | <i>Amplicon (bp)</i> | <i>Efficiency (%)</i> |
|-------------|--------------------------------|-------------------------------|----------------------|-----------------------|
| ACAN        | CTGTGACATAGACAAGGAGAT          | GACGATGCTGCTCAGG              | 142                  | 92                    |
| ACTA2       | CGTGATCTCACCGACTACCT           | GCGGAAGCGTTTCGTTCCCCG         | 222                  | 98                    |
| ACVRL1      | CGTACTGGTCAAGAGCAA             | ATGTCAGTCCACTTGTAGG           | 189                  | 94                    |
| ADAMTS5     | TCTTCCATCCTAACCAGCATTG         | GGTGGCATCATAAGTCTGTCC         | 165                  | 98                    |
| ANGPTL7     | GCTGTCACTTGGCTCTG              | AGTCCTTCTCCTGCTTCTTG          | 193                  | 94                    |
| ANXA1       | ACAAAGTTCTGGACCTGGAGTTGA       | AGAGCGGGAAACCATAATCCTGAT      | 167                  | 95                    |
| ANXA2       | CTTCCGCAAGCTGATG               | CATGATGCTGATCCACTT            | 154                  | 99                    |
| CAPN2       | GGCTGACCAGACGGCATGAAG          | CTCCATCTTGGTGAGTTTCCATTCTTG   | 146                  | 88                    |
| CAPNS1      | TGACCGATCAGGGACCATCTG          | GGATTTGTCCACTGCCATCTTTG       | 215                  | 92                    |
| COL12A1     | CAGGTGTCCCGATCAAAGAG           | GCCTGGTGGAAATGGTGG            | 95                   | 97                    |
| COL14A1     | TCACCTCTACTCAACCACCAACT        | GGCTCCAACAGTGCTATACAGAAAGT    | 165                  | 94                    |
| COL1A1      | GCCCTTCTGGAAATGC               | GACCAACTTACCAGGA              | 111                  | 95                    |
| CTGF        | CCAACTATGATTCGAGCCAACTG        | TTCTCTCCAGGTCTGCTTCA          | 173                  | 96                    |
| CYR61       | TGGAACCTCGCATTCTGTATAACC       | GCCACAAGTCGCACTTCAC           | 176                  | 97                    |
| DCN         | CTGCGTGCCCATGAGAACGAGATC       | GGTATCAGCAATGCGGATGTACGAAAGC  | 168                  | 96                    |
| EFNA1       | CCACCATCAAGAAGACCAGT           | CCAGGCAAGAGGGGAAGAG           | 178                  | 97                    |
| FBLN1       | CGAGGAGGAGCAAGAG               | AGCACGAGCAGACTAC              | 104                  | 94                    |
| FGFR2       | TGAAGGAAGGACACAGGATGGATAAG     | GAGGCTGACTGAGGTCCAAGTATTC     | 180                  | 93                    |
| FMOD        | TCCTGTGGACCTGAGCA              | TTGTTGGTGAGGCTGTTAT           | 172                  | 96                    |
| GJA1        | CCTAGCCATTGTGGACCA             | ATCTCCAGTCCATCAGGC            | 81                   | 99                    |
| HIF1A       | ACTGGTTGCATCTCCGTCTCCTACTCA    | TCCTGCTGTGTTGGTGAGGCTGTC      | 109                  | 94                    |
| HS6ST1      | CGTTCAACCTCAAGTTCATCC          | GGTCCTTGGCGTAGTCAT            | 141                  | 98                    |
| IGF1        | GTCCTCCTCACATCTCTTCTACC        | CAGCACCGCAGAGTGTCTC           | 89                   | 99                    |
| IGF2        | TGGCATTGTTGAAGAGTGTTG          | GAAGCACGGTCGGAGAG             | 113                  | 100                   |
| IL18        | AACTCTTTCTTTAAGAATATCAGTCGTCCT | GTTGGCTTCCACAGTAAACATTACAGATT | 226                  | 94                    |
| KERA        | TCTCACAATCAGTCCACCAAGGTT       | CCAGACGGAGGTAGCGAAGATG        | 175                  | 101                   |
| MMP14       | CCCTGGAACCTGGTACCC             | ATAGGTCTTCCATTGGGCATCC        | 104                  | 96                    |
| MMP2        | TGACCTTGACCAGAACACCATCG        | GAGCGAAGGCATCATCCACTGT        | 176                  | 95                    |
| NGEF        | ACCACTTCTCCGTGTAC              | GACTAGGAGCTTGAGGC             | 194                  | 96                    |
| NOV         | CGAACAGACTACAGAGTGGAGTG        | GTGATTTCTTGGTGCGGAGACA        | 191                  | 97                    |
| NPR3        | GGACTACGCCTTCTTCAACATCG        | AGAGTGACTGTTTGGAGGGATGA       | 126                  | 96                    |
| NYX         | GTGAGCAGGTTCCAGCAG             | GACAGCGAGGTGTTAGC             | 101                  | 96                    |
| OGN         | CTCTCCTTCTCTACCTGGACCACAAC     | CTGAAGATGGATCAGCGCAGACTC      | 84                   | 96                    |
| PENK        | TCCTTGCCAAAGCGATACG            | TCTTGCTCATTTCTTCGTCGTT        | 162                  | 98                    |
| PRELP       | TTCGGCTGAACTACAACAAGC          | GATCTGGGTCCCCTTGATTTTCT       | 182                  | 99                    |
| RARB        | CGGCTTGACCATCGCAGAC            | GCTGGTTGGCAAAGGTGAACA         | 197                  | 97                    |
| RXRB        | CCTGACCTACTCGTGCC              | TACCGCCTCCCTCTTCA             | 118                  | 91                    |
| SDC2        | TGATGACGACTACGCTTCTGC          | CAGGCATCTTGTCTGTGTCTTC        | 155                  | 95                    |
| SERPINH1    | ACAAGAACAAGGCAGAC              | GCACCAGGAAGATGAAG             | 186                  | 103                   |
| SPARC       | GCGAGTTTGAGAAGGTGTGC           | GCCCGATGTAGTCCAGGTG           | 126                  | 102                   |
| SPP1        | CCGACGACACCGACCATCC            | GGCTTTGACCTCACTCTGTAAACC      | 190                  | 92                    |
| TGFB1       | ACCAGAAATACAGCAACAATTCC        | AACCCGTTGATGTCCACTTG          | 205                  | 91                    |
| TGFB2       | GCAGAGTTTAGGGTCTTTCGTTTG       | CTCGTGACAGCATCAGTTACATC       | 189                  | 93                    |
| TGFBI       | CCTCGGCACTCATCTCTCC            | GCAAATTCATCTTGGCATCG          | 107                  | 94                    |
| TGFBR3      | CCCTGGTCTGGCGTCTGAAG           | GTAAGTCTCCATACTCGTTTCGG       | 190                  | 93                    |
| THBS1       | CTGTGAGAACTCAGTACCATC          | CCACGGAGACCAGCCATC            | 136                  | 91                    |
| THBS2       | GAGACCGACTTCAGGAATTC           | CGAAACCCACTGCGATGC            | 142                  | 100                   |
| TIMP1       | CACTTGACATCACACCT              | CAAGGGATGGATAAACAGGGAAA       | 134                  | 99                    |
| TIMP2       | AGATGGGCTGTGAATGC              | CCGTCGCTTCTTTGAT              | 151                  | 96                    |
| TIMP3       | CCGTGTCTATGATGGCAAGATG         | ACAAAGCAAGGCAGGTAATAGC        | 153                  | 99                    |
| TNC         | AGACGCCAAGACTCGCTACAG          | CAGGTTGACACGGTGACAGTTC        | 184                  | 94                    |
| TRPV4       | AGAGCAAGCACATCTGGAA            | CCACGGTACCATCTCC              | 111                  | 94                    |
| UNC5B       | CACCTGCTGGCTCCCTG              | ATGGACAGCGGGATCTTGAA          | 94                   | 96                    |
| VDR         | AACTTGACAGGAGGAAC              | CTTCTGGATCATCTTGGCATAG        | 189                  | 93                    |
| WISP1       | AGGCACCCATGAACTT               | GACTGGAAGGAGACA               | 135                  | 96                    |
| POLR2A      | CTACCAGCCCCAAGTATTC            | GGTGAGTAAGTAGGAGACG           | 106                  | 98                    |
